# Supplementary material for: Complete plastid genome sequence of Vaccinium macrocarpon: structure, gene content, and rearrangements revealed by next generation sequencing
Source: Springer Nature journal article supplement (doi:10.1007/s11295-012-0573-9), 2012-11-06

**Supplemental Figure 1** Coverage of raw reads from cranberry plastid assembly mapped against complete plastid genome (JQ757046).The annotated genes and tRNAs are indicated by green and pink colored blocks respectively.


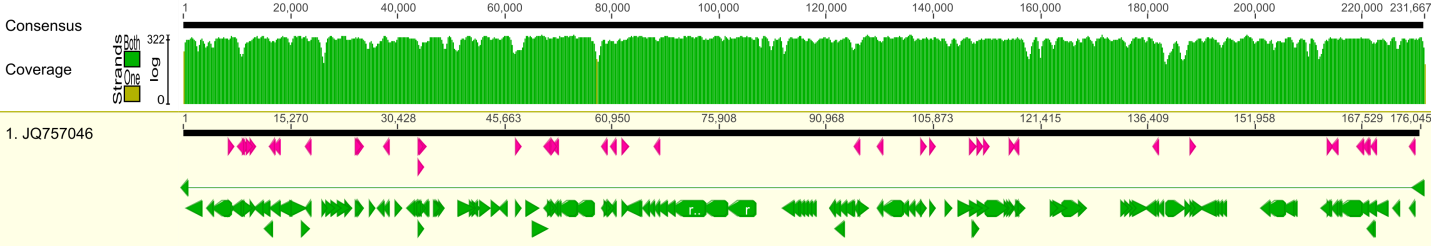

Supplement: MOESM1 [file 11295_2012_573_MOESM1_ESM.docx]
